# Supplementary material for: An updated systematic review and meta-analysis on adherence to mediterranean diet and risk of cancer
Source: Springer Nature journal article supplement (doi:10.1007/s00394-020-02346-6), 2020-08-08
Supplement: MOESM1 [file 18258888]

# Electronic Supplementary Material

## Content:

**ESM Figure 1.** Flowchart of study selection process in the updated systematic review.

**ESM Table 1.** Reasons for study exclusion at the full-text eligibility assessment step.

**ESM Figure 2.** Forest plot presenting pooled risk ratio with 95% confidence interval (CI) for all-cause mortality among cancer survivors in cohort studies.

**ESM Figure 3.** Forest plot presenting pooled risk ratio with 95% confidence interval (CI) for biliary tract cancer in cohort studies.

**ESM Figure 4.** Forest plot presenting pooled odds and risk ratios with 95% confidence interval (CI) for bladder cancer in case-control and cohort studies.

**ESM Figure 5.** Forest plot presenting pooled odds and risk ratios with 95% confidence interval (CI) for blood cancer in case-control and cohort studies.

**ESM Figure 6.** Forest plot presenting pooled odds and risk ratios with 95% confidence interval (CI) for breast cancer in case-control, cohort studies and RCTs.

**ESM Figure 7.** Forest plot presenting pooled risk ratio with 95% confidence interval (CI) for cancer recurrence among cancer survivors in cohort studies.

**ESM Figure 8.** Forest plot presenting pooled risk ratio with 95% confidence interval (CI) for cancer mortality among cancer survivors in cohort studies.

**ESM Figure 9.** Forest plot presenting pooled risk ratios with 95% confidence interval (CI) for cancer mortality in cohort studies and RCTs.

**ESM Figure 10.** Forest plot presenting pooled odds and risk ratios with 95% confidence interval (CI) for colorectal cancer in case-control and cohort studies.

**ESM Figure 11.** Forest plot presenting pooled odds and risk ratios with 95% confidence interval (CI) for endometrial cancer in case-control and cohort studies.

**ESM Figure 12.** Forest plot presenting pooled odds and risk ratios with 95% confidence interval (CI) for esophageal cancer in case-control and cohort studies.

**ESM Figure 13.** Forest plot presenting pooled risk ratio with 95% confidence interval (CI) for gallbladder cancer in cohort studies.

**ESM Figure 14.** Forest plot presenting pooled odds and risk ratios with 95% confidence interval (CI) for gastric cancer in case-control and cohort studies.

**ESM Figure 15.** Forest plot presenting pooled risk ratio with 95% confidence interval (CI) for glioma in cohort studies.

**ESM Figure 16.** Forest plot presenting pooled odds and risk ratios with 95% confidence interval (CI) for head and neck cancer in case-control and cohort studies.

**ESM Figure 17.** Forest plot presenting pooled odds and risk ratios with 95% confidence interval (CI) for liver cancer in case-control and cohort studies.

**ESM Figure 18.** Forest plot presenting pooled risk ratio with 95% confidence interval (CI) for ovarian cancer in cohort studies.

**ESM Figure 19.** Forest plot presenting pooled odds and risk ratios with 95% confidence interval (CI) for pancreatic cancer in case-control and cohort studies.

**ESM Figure 20.** Forest plot presenting pooled odds and risk ratios with 95% confidence interval (CI) for prostate cancer in case-control and cohort studies.

**ESM Figure 21.** Forest plot presenting pooled risk ratio with 95% confidence interval (CI) for respiratory cancer in cohort studies.

**ESM Figure 22.** Forest plot presenting pooled risk ratio with 95% confidence interval (CI) for skin cancer in cohort studies.

**ESM Figure 23.** Funnel plot showing study precision against the relative risk effect estimate for cancer mortality.

**ESM Figure 24.** Funnel plot showing study precision against the relative risk effect estimate for breast cancer.

**ESM Figure 25.** Funnel plot showing study precision against the relative risk effect estimate for colorectal cancer.

**ESM Table 2.** Subgroup analysis for association between adherence to the MedDiet and risk of cancer mortality.

**ESM Table 3.** Subgroup analysis for association between adherence to the MedDiet and risk of breast cancer.

**ESM Table 4.** Subgroup analysis for association between adherence to the MedDiet and risk of colorectal cancer.

**ESM Table 5.** Item-level scoring for NutriGrade tool and quality of evidence for identified associations in prospective observational studies and randomized controlled trials.

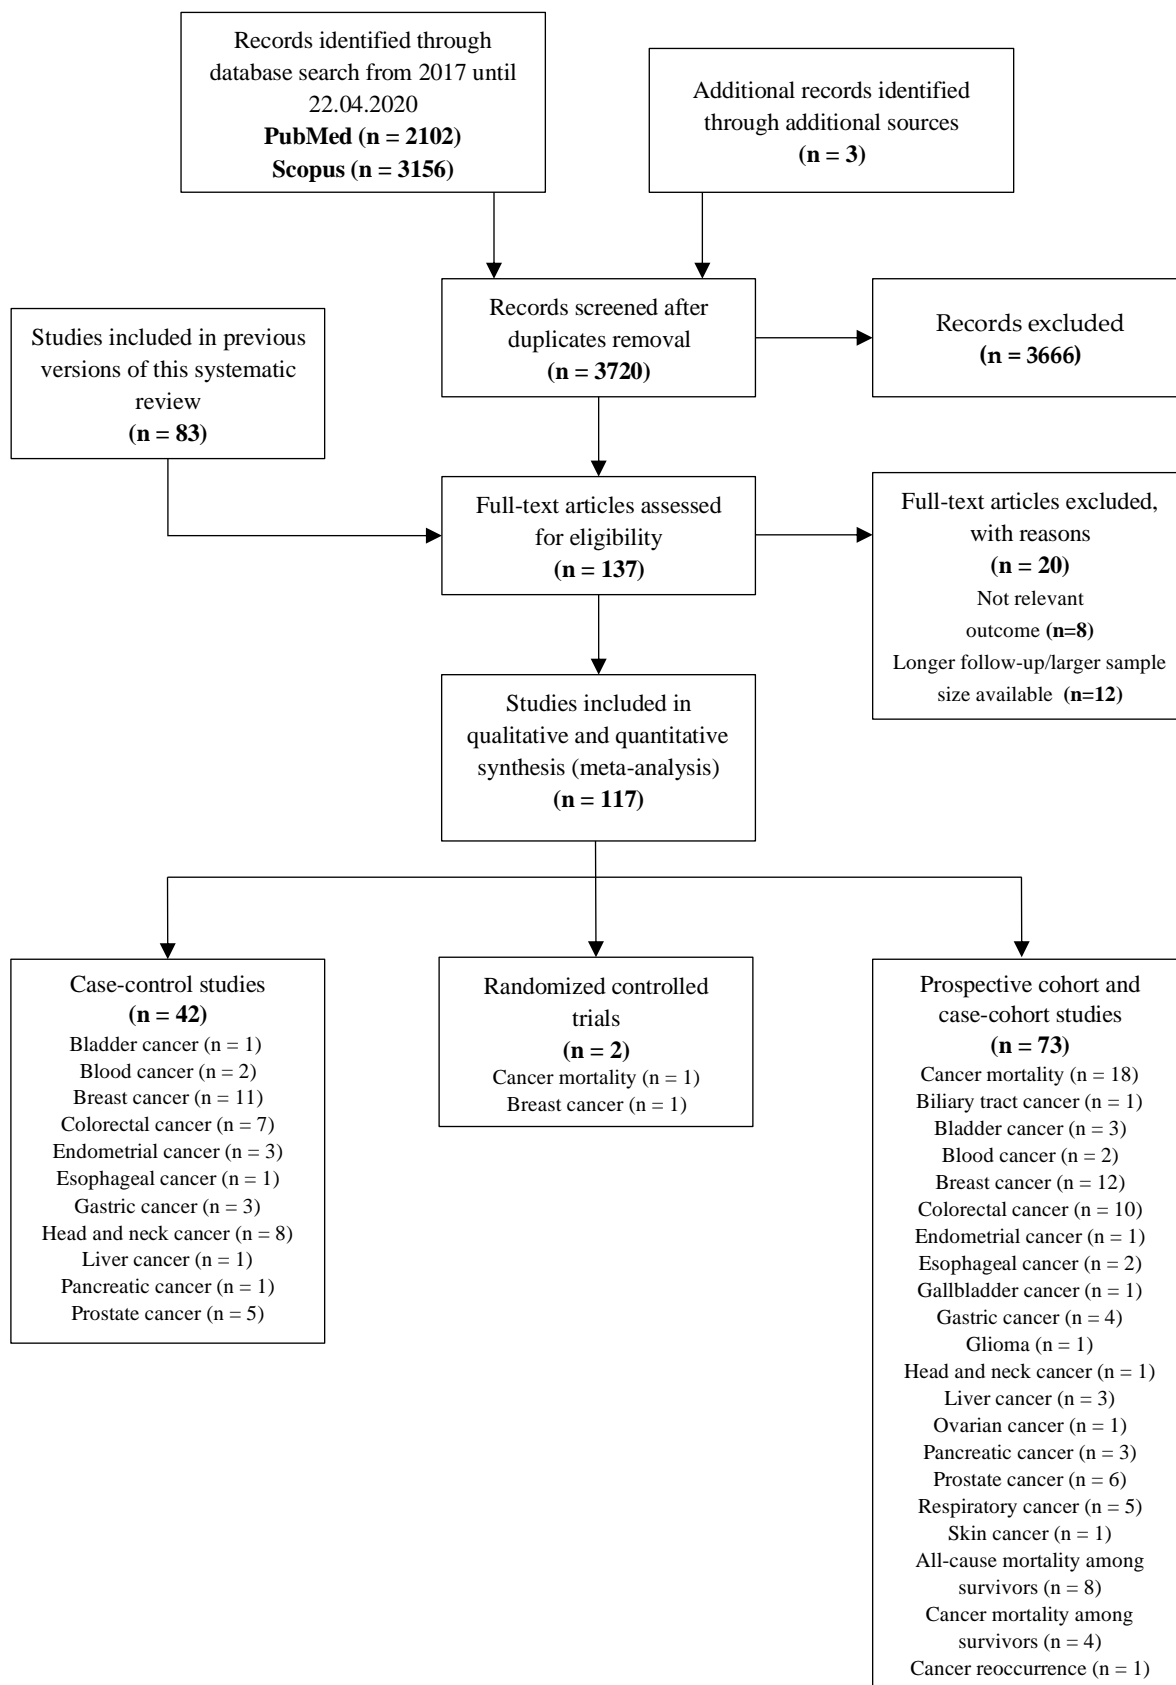

**ESM Figure 1.** Flowchart of study selection process in the updated systematic review.

**ESM Table 1.** Reasons for study exclusion at the full-text eligibility assessment step.

|        |                                               |
|--------|-----------------------------------------------|
| [1-8]  | Not relevant outcome                          |
| [9-20] | Longer follow-up/larger sample size available |

**References:**

- Alvarez-Alvarez I, Zazpe I, Pérez de Rojas J, Bes-Rastrollo M, Ruiz-Canela M, Fernandez-Montero A, Hidalgo-Santamaría M, Martínez-González MA (2018) Mediterranean diet, physical activity and their combined effect on all-cause mortality: The Seguimiento Universidad de Navarra (SUN) cohort. *Preventive Medicine* 106:45-52. doi:10.1016/j.ypmed.2017.09.021
- Bauer SR, Van Blarigan EL, Stampfer MJ, Chan JM, Kenfield SA (2018) Mediterranean diet after prostate cancer diagnosis and urinary and sexual functioning: The health professionals follow-up study. *The Prostate* 78 (3):202-212. doi:10.1002/pros.23457
- Fasanelli F, Giraud MT, Vineis P, Fiano V, Fiorito G, Grasso C, Polidoro S, Trevisan M, Grioni S, Krogh V, Mattiello A, Panico S, Giurdanella MC, Tumino R, De Marco L, Ricceri F, Sacerdote C (2019) DNA methylation, colon cancer and Mediterranean diet: results from the EPIC-Italy cohort. *Epigenetics* 14 (10):977-988. doi:10.1080/15592294.2019.1629230
- Ghanavti M, Movahed M, Rashidkhani B, Rakhsha A, Hejazi E (2019) Index-Based Dietary Patterns and the Risk of Prostate Cancer among Iranian Men. *Asian Pacific Journal of Cancer Prevention* 20 (5):1393-1401. doi:10.31557/apjcp.2019.20.5.1393
- Krusińska B, Hawrysz I, Słowińska MA, Wądołowska L, Biernacki M, Czerwińska A, Gołota JJ (2017) Dietary patterns and breast or lung cancer risk: A pooled analysis of 2 case-control studies in north-eastern Poland. *Advances in Clinical and Experimental Medicine* 26 (9):1367-1375. doi:10.17219/acem/65433
- Shikany JM, Safford MM, Bryan J, Newby PK, Richman JS, Durant RW, Brown TM, Judd SE (2018) Dietary Patterns and Mediterranean Diet Score and Hazard of Recurrent Coronary Heart Disease Events and All-Cause Mortality in the REGARDS Study. *Journal of the American Heart Association* 7 (14). doi:10.1161/jaha.117.008078
- Urquiza-Salvat N, Pascual-Geler M, Lopez-Guarnido O, Rodrigo L, Martinez-Burgos A, Cozar JM, Ocaña-Peinado FM, Álvarez-Cubero MJ, Rivas A (2019) Adherence to Mediterranean diet and risk of prostate cancer. *The Aging Male* 22 (2):102-108. doi:10.1080/13685538.2018.1450854
- Zaslavsky O, Zelber-Sagi S, Shikany JM, Orchard T, Wallace R, Snetselaar L, Tinker L (2018) Anatomy of the Mediterranean Diet and Mortality Among Older Women with Frailty. *Journal of nutrition in gerontology and geriatrics* 37 (3-4):269-281. doi:10.1080/21551197.2018.1496217
- Bonaccio M, Di Castelnuovo A, Costanzo S, De Curtis A, Persichillo M, Cerletti C, Donati MB, de Gaetano G, Iacoviello L (2019) Impact of combined healthy lifestyle factors on survival in an adult general population and in high-risk groups: prospective results from the Moli-sani Study. *Journal of Internal Medicine* 286 (2):207-220. doi:10.1111/joim.12907
- Buckland G, Agudo A, Travier N, Huerta JM, Cirera L, Tormo MJ, Navarro C, Chirlaque MD, Moreno-Iribas C, Ardanaz E, Barricarte A, Etxeberria J, Marin P, Quiros JR, Redondo ML, Larranaga N, Amiano P, Dorronsoro M, Arriola L, Basterretxea M, Sanchez MJ, Molina E, Gonzalez CA (2011) Adherence to the Mediterranean diet reduces mortality in the Spanish cohort of the European Prospective Investigation into Cancer and Nutrition (EPIC-Spain). *The British Journal of Nutrition* 106 (10):1581-1591. doi:10.1017/s0007114511002078
- Buckland G, Ros MM, Roswall N, Bueno-de-Mesquita HB, Travier N, Tjønneland A, Kiemeny LA, Sacerdote C, Tumino R, Ljungberg B, Gram IT, Weiderpass E, Skeie G, Malm J, Ehrnstrom R, Chang-Claude J, Mattiello A, Agnoli C, Peeters PH, Boutron-Ruault MC, Fagherazzi G, Clavel-Chapelon F, Nilsson LM, Amiano P, Trichopoulou A, Oikonomou E, Tsiotas K, Sanchez MJ, Overvad K, Quiros JR, Chirlaque MD, Barricarte A, Key TJ, Allen NE, Khaw KT, Wareham N, Riboli E, Kaaks R, Boeing H, Palli D, Romieu I, Romaguera D, Gonzalez CA (2014) Adherence to the Mediterranean diet and risk of bladder cancer in the EPIC cohort study. *International Journal of Cancer* 134 (10):2504-2511. doi:10.1002/ijc.28573
- Couto E, Boffetta P, Lagiou P, Ferrari P, Buckland G, Overvad K, Dahm CC, Tjønneland A, Olsen A, Clavel-Chapelon F, Boutron-Ruault MC, Cottet V, Trichopoulos D, Naska A, Benetou V, Kaaks R, Rohrmann S, Boeing H, von Ruesten A, Panico S, Pala V, Vineis P, Palli D, Tumino R, May A, Peeters PH, Bueno-de-Mesquita HB, Buchner FL, Lund E, Skeie G, Engeset D, Gonzalez CA, Navarro C, Rodriguez L, Sanchez MJ, Amiano P, Barricarte A, Hallmans G, Johansson I, Manjer J, Wirfart E, Allen NE, Crowe F, Khaw KT, Wareham N, Moskal A, Slimani N, Jenab M, Romaguera D, Mouw T, Norat T, Riboli E, Trichopoulou A (2011) Mediterranean dietary pattern and cancer risk in the EPIC cohort. *British Journal of Cancer* 104 (9):1493-1499. doi:10.1038/bjc.2011.106

13. Fasanelli F, Zugna D, Giraudo MT, Krogh V, Grioni S, Panico S, Mattiello A, Masala G, Caini S, Tumino R, Frasca G, Sciannameo V, Ricceri F, Sacerdote C (2017) Abdominal adiposity is not a mediator of the protective effect of Mediterranean diet on colorectal cancer. *International Journal of Cancer* 140 (10):2265-2271. doi:10.1002/ijc.30653
14. Fung TT, Hu FB, Wu K, Chiuve SE, Fuchs CS, Giovannucci E (2010) The Mediterranean and Dietary Approaches to Stop Hypertension (DASH) diets and colorectal cancer. *American Journal of Clinical Nutrition* 92 (6):1429-1435. doi:10.3945/ajcn.2010.29242
15. Galbete C, Kröger J, Jannasch F, Iqbal K, Schwingshackl L, Schwedhelm C, Weikert C, Boeing H, Schulze MB (2018) Nordic diet, Mediterranean diet, and the risk of chronic diseases: the EPIC-Potsdam study. *BMC Medicine* 16 (1):99. doi:10.1186/s12916-018-1082-y
16. Gnagnarella P, Maisonneuve P, Bellomi M, Rampinelli C, Bertolotti R, Spaggiari L, Palli D, Veronesi G (2013) Red meat, Mediterranean diet and lung cancer risk among heavy smokers in the COSMOS screening study. *Annals of Oncology* 24 (10):2606-2611. doi:10.1093/annonc/mdt302
17. Haridass V (2015) Diet Quality Scores and Risk of Incident Breast Cancer in the California Teachers Study 2015.
18. Hirko KA, Willett WC, Hankinson SE, Rosner BA, Beck AH, Tamimi RM, Eliassen AH (2016) Healthy dietary patterns and risk of breast cancer by molecular subtype. *Breast Cancer Research and Treatment* 155 (3):579-588. doi:10.1007/s10549-016-3706-2
19. Lopez-Garcia E, Rodriguez-Artalejo F, Li TY, Fung TT, Li S, Willett WC, Rimm EB, Hu FB (2014) The Mediterranean-style dietary pattern and mortality among men and women with cardiovascular disease. *American Journal of Clinical Nutrition* 99 (1):172-180. doi:10.3945/ajcn.113.068106
20. Toledo E, Salas-Salvado J, Donat-Vargas C, Buil-Cosiales P, Estruch R, Ros E, Corella D, Fito M, Hu FB, Aros F, Gomez-Gracia E, Romaguera D, Ortega-Calvo M, Serra-Majem L, Pinto X, Schroder H, Basora J, Sorli JV, Bullo M, Serra-Mir M, Martinez-Gonzalez MA (2015) Mediterranean Diet and Invasive Breast Cancer Risk Among Women at High Cardiovascular Risk in the PREDIMED Trial: A Randomized Clinical Trial. *JAMA Internal Medicine* 175 (11):1752-1760. doi:10.1001/jamainternmed.2015.4838

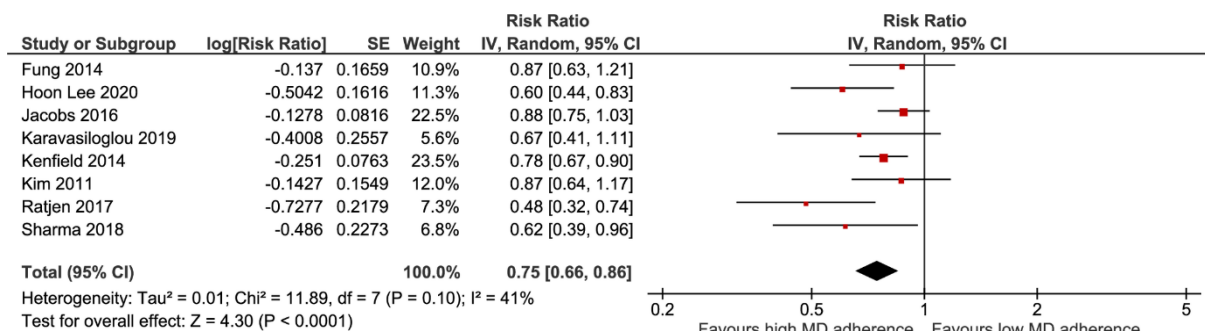

**ESM Figure 2.** Forest plot presenting pooled risk ratio with 95% confidence interval (CI) for all-cause mortality among cancer survivors in cohort studies. MD – Mediterranean diet;

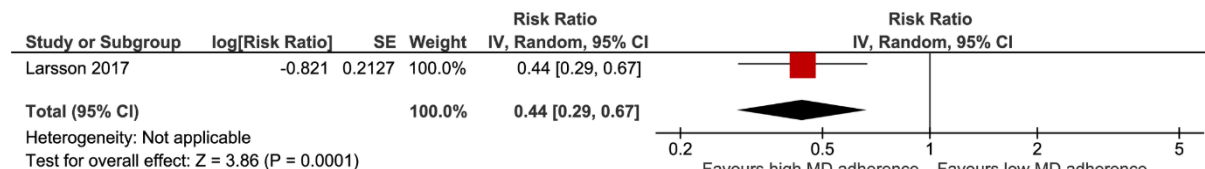

**ESM Figure 3.** Forest plot presenting pooled risk ratio with 95% confidence interval (CI) for biliary tract cancer in cohort studies. MD – Mediterranean diet;

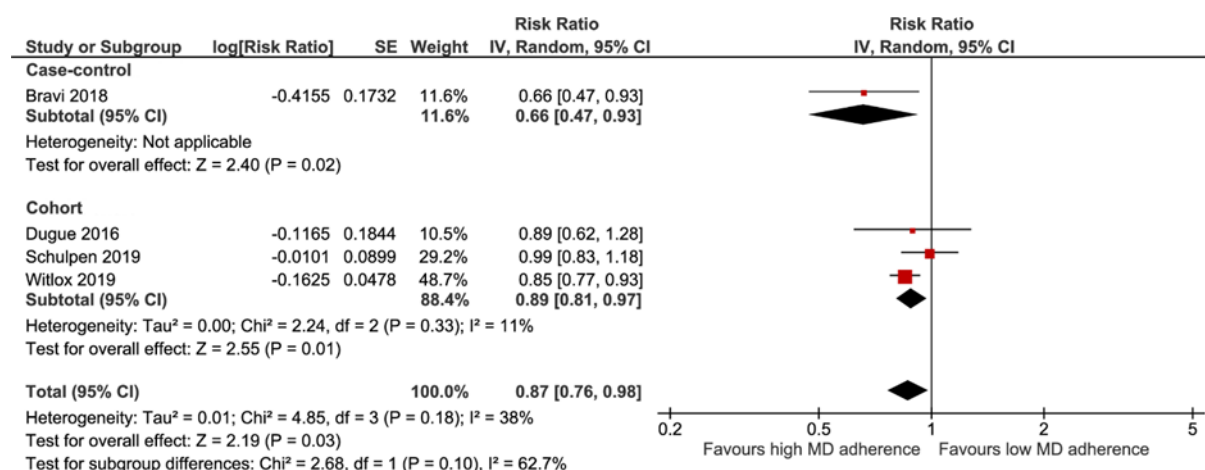

**ESM Figure 4.** Forest plot presenting pooled odds and risk ratios with 95% confidence interval (CI) for bladder cancer in case-control and cohort studies. MD – Mediterranean diet;

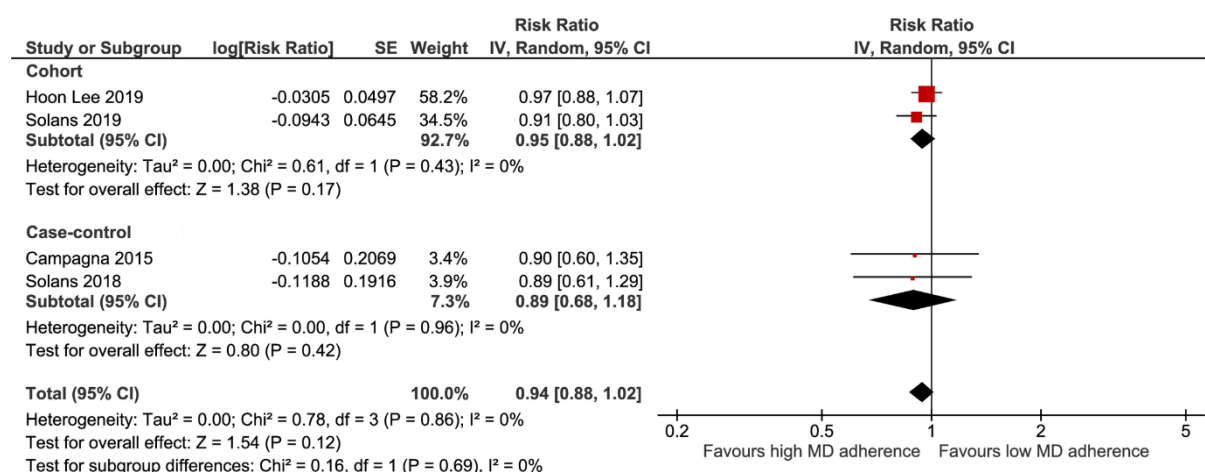

**ESM Figure 5.** Forest plot presenting pooled odds and risk ratios with 95% confidence interval (CI) for blood cancer in case-control and cohort studies. MD – Mediterranean diet;

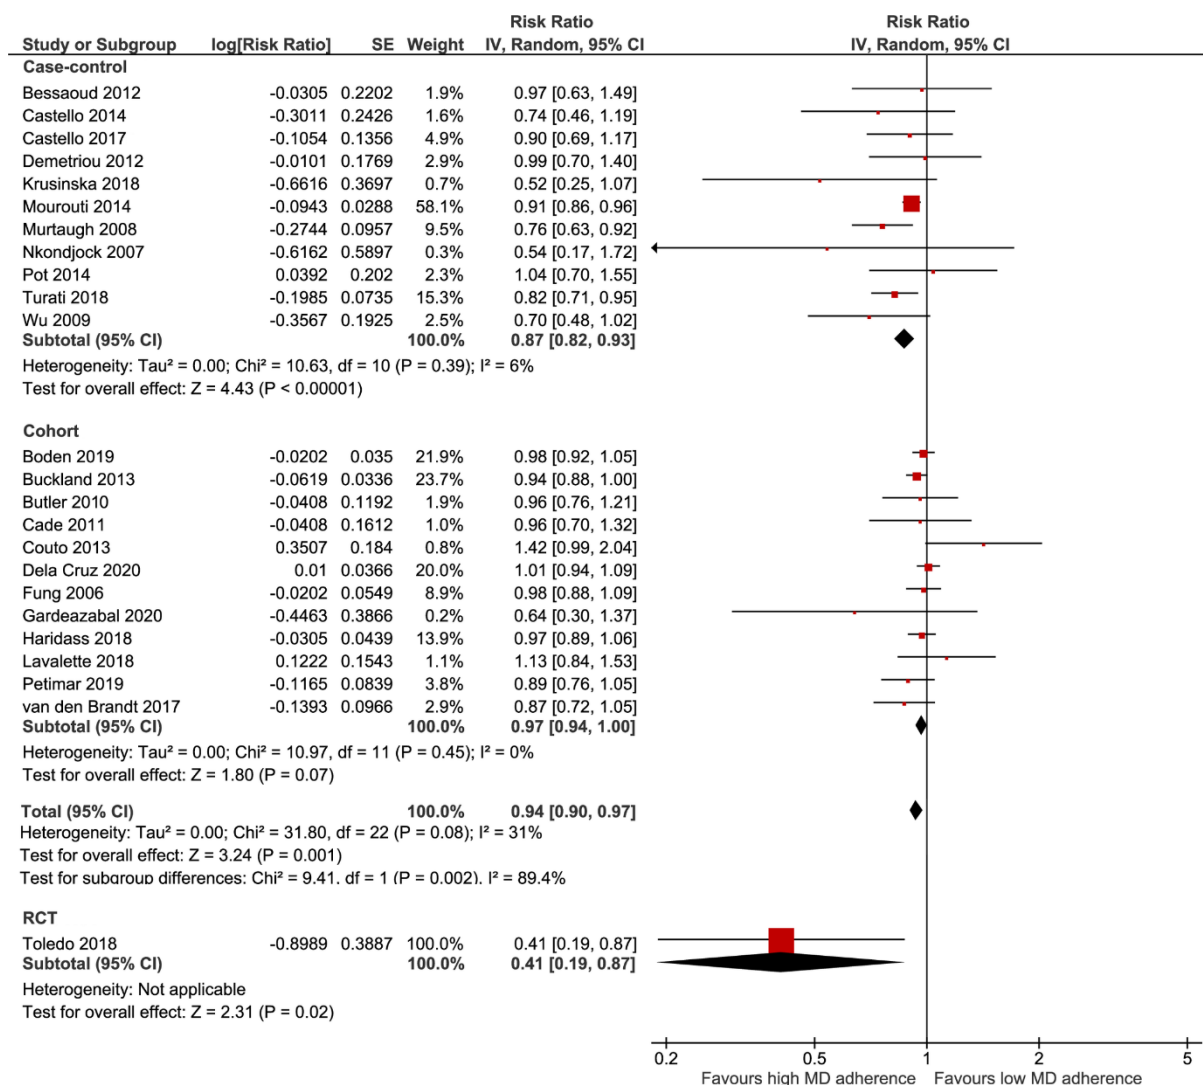

**ESM Figure 6.** Forest plot presenting pooled odds and risk ratios with 95% confidence interval (CI) for breast cancer in case-control, cohort studies and RCTs. MD – Mediterranean diet; RCT – Randomized controlled trial;

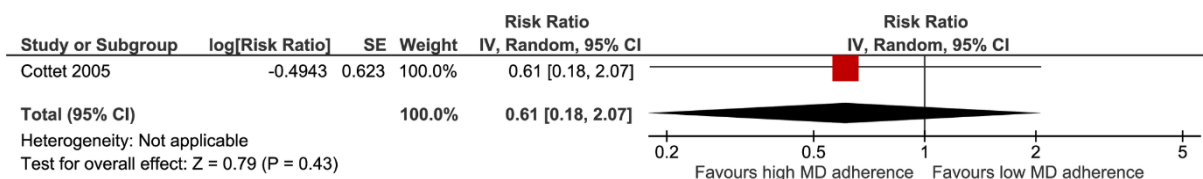

**ESM Figure 7.** Forest plot presenting pooled risk ratio with 95% confidence interval (CI) for cancer recurrence among cancer survivors in cohort studies. MD – Mediterranean diet;

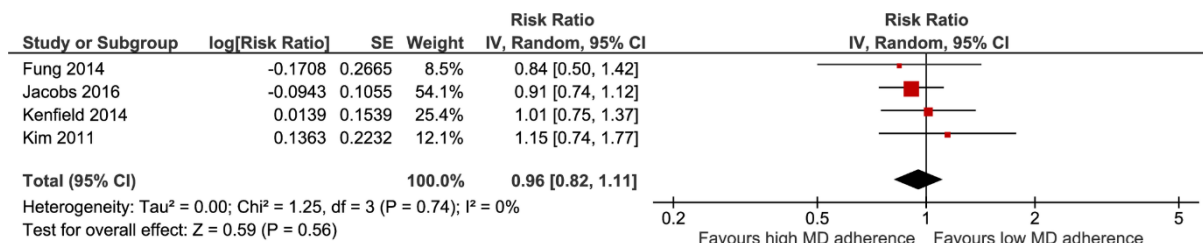

**ESM Figure 8.** Forest plot presenting pooled risk ratio with 95% confidence interval (CI) for cancer mortality among cancer survivors in cohort studies. MD – Mediterranean diet;

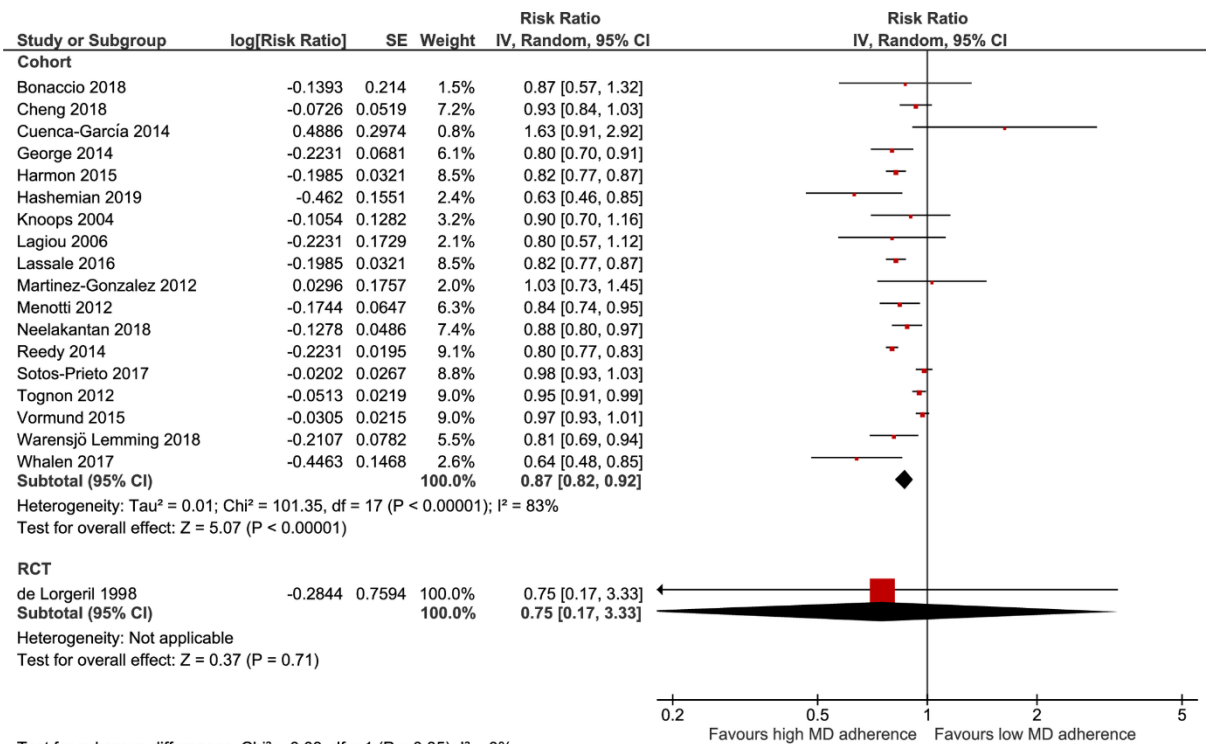

Test for subgroup differences: Chi<sup>2</sup> = 0.03, df = 1 (P = 0.85), I<sup>2</sup> = 0%

**ESM Figure 9.** Forest plot presenting pooled risk ratios with 95% confidence interval (CI) for cancer mortality in cohort studies and RCTs. MD – Mediterranean diet; RCT – Randomized controlled trial;

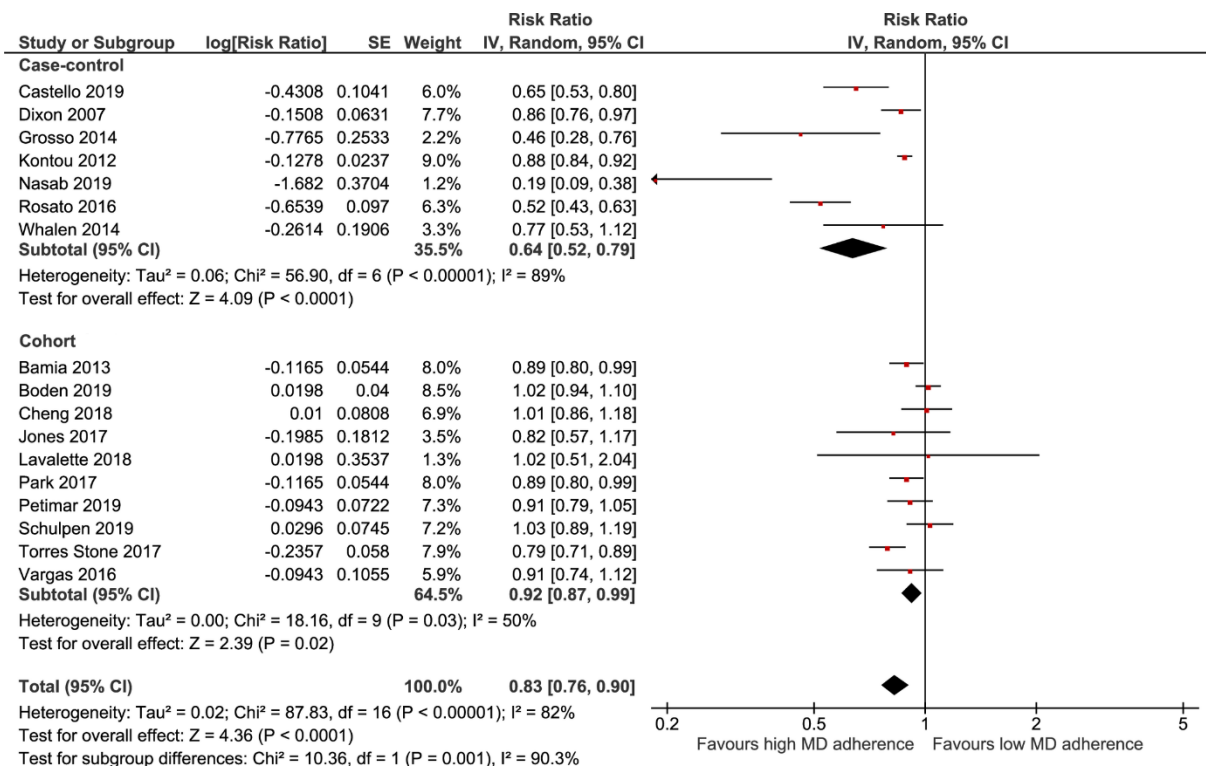

**ESM Figure 10.** Forest plot presenting pooled odds and risk ratios with 95% confidence interval (CI) for colorectal cancer in case-control and cohort studies. MD – Mediterranean diet;



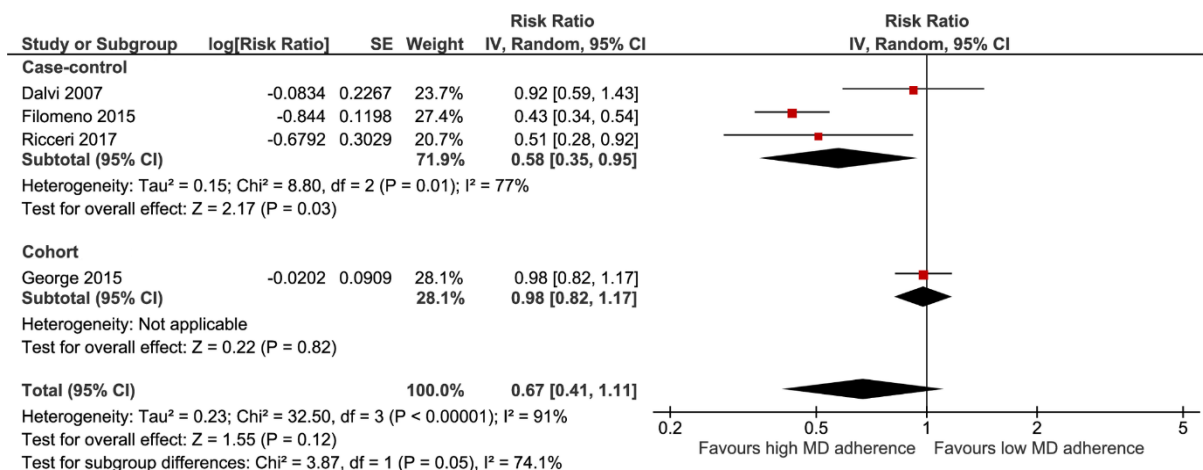

**ESM Figure 11.** Forest plot presenting pooled odds and risk ratios with 95% confidence interval (CI) for endometrial cancer in case-control and cohort studies. MD – Mediterranean diet;

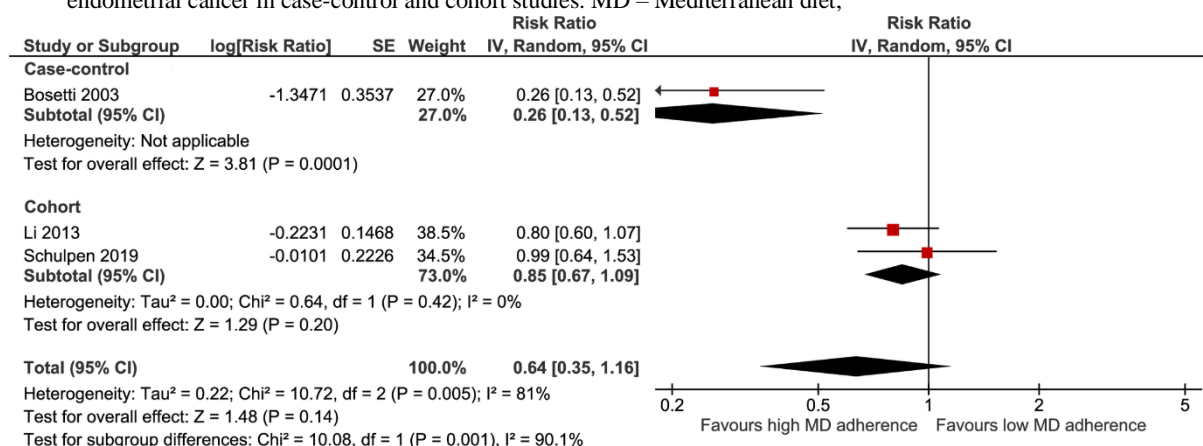

**ESM Figure 12.** Forest plot presenting pooled odds and risk ratios with 95% confidence interval (CI) for esophageal cancer in case-control and cohort studies. MD – Mediterranean diet;

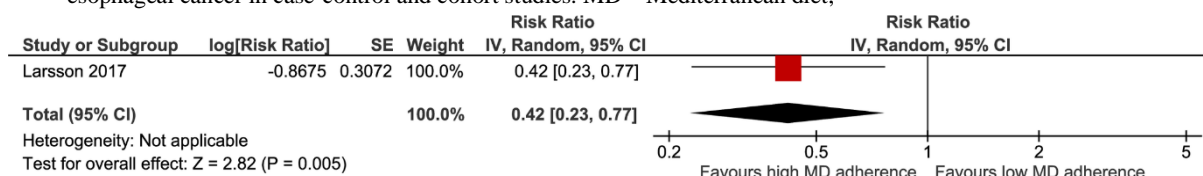

**ESM Figure 13.** Forest plot presenting pooled risk ratio with 95% confidence interval (CI) for gallbladder cancer in cohort studies. MD – Mediterranean diet;

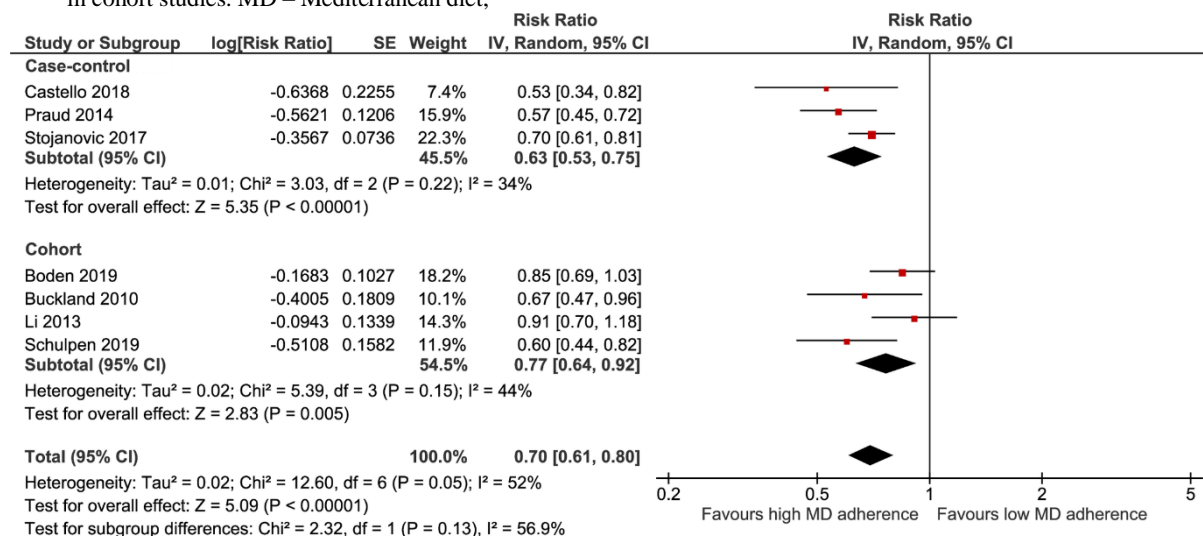

**ESM Figure 14.** Forest plot presenting pooled odds and risk ratios with 95% confidence interval (CI) for gastric cancer in case-control and cohort studies. MD – Mediterranean diet;

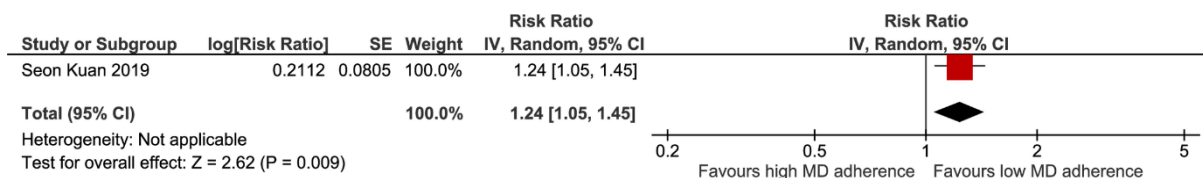

**ESM Figure 15.** Forest plot presenting pooled risk ratio with 95% confidence interval (CI) for glioma in cohort studies. MD – Mediterranean diet;

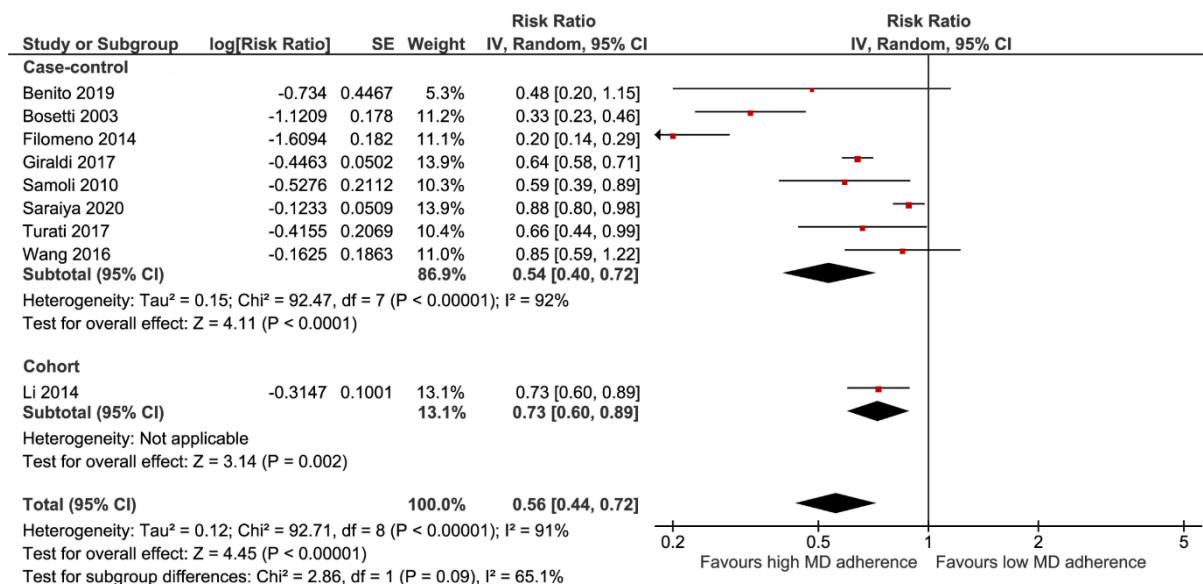

**ESM Figure 16.** Forest plot presenting pooled odds and risk ratios with 95% confidence interval (CI) for head and neck cancer in case-control and cohort studies. MD – Mediterranean diet;

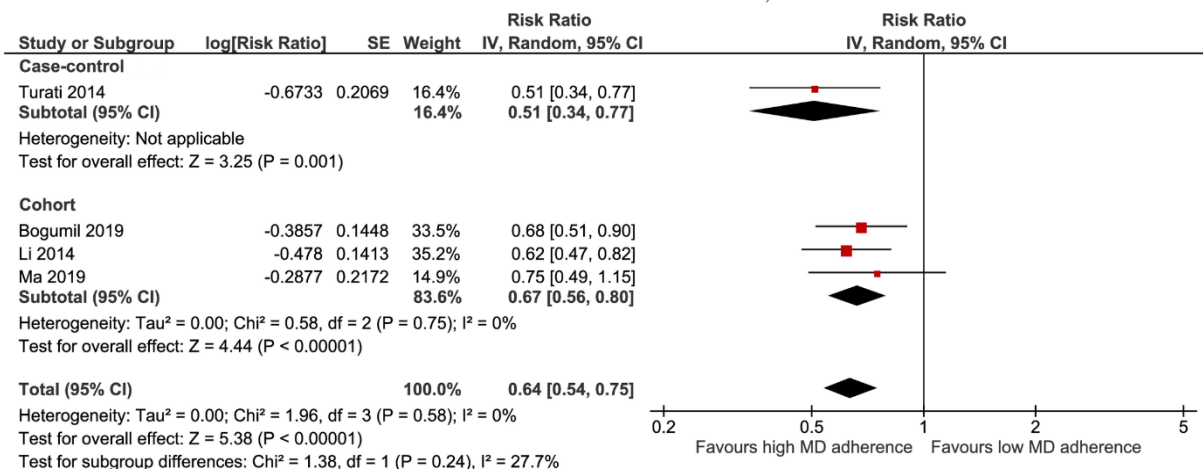

**ESM Figure 17.** Forest plot presenting pooled odds and risk ratios with 95% confidence interval (CI) for liver cancer in case-control and cohort studies. MD – Mediterranean diet;

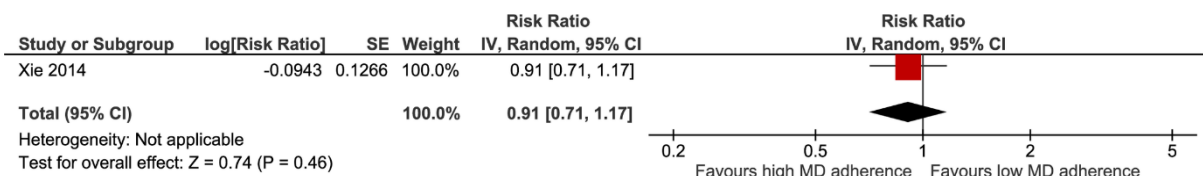

**ESM Figure 18.** Forest plot presenting pooled risk ratio with 95% confidence interval (CI) for ovarian cancer in cohort studies. MD – Mediterranean diet;

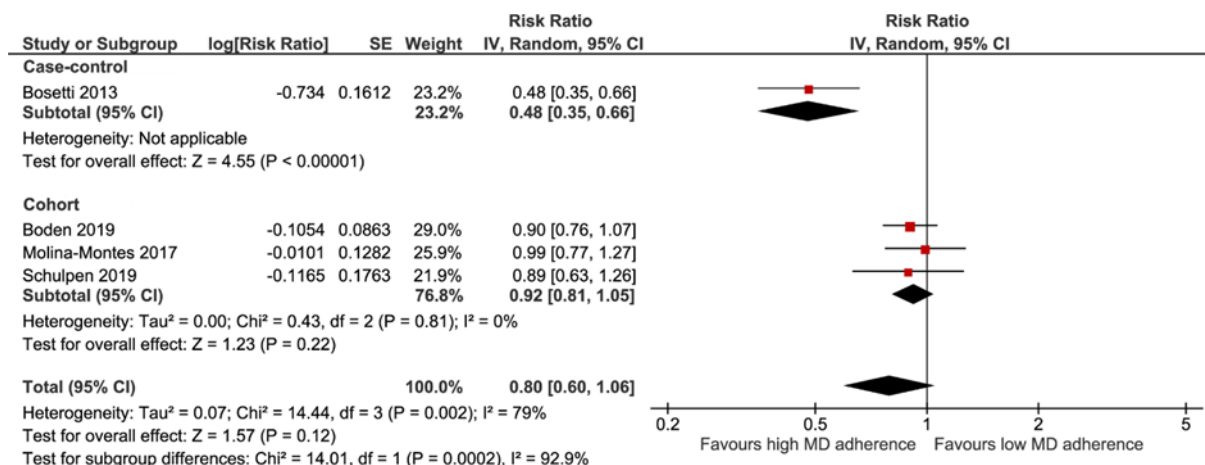

**ESM Figure 19.** Forest plot presenting pooled odds and risk ratios with 95% confidence interval (CI) for pancreatic cancer in case-control and cohort studies. MD – Mediterranean diet;

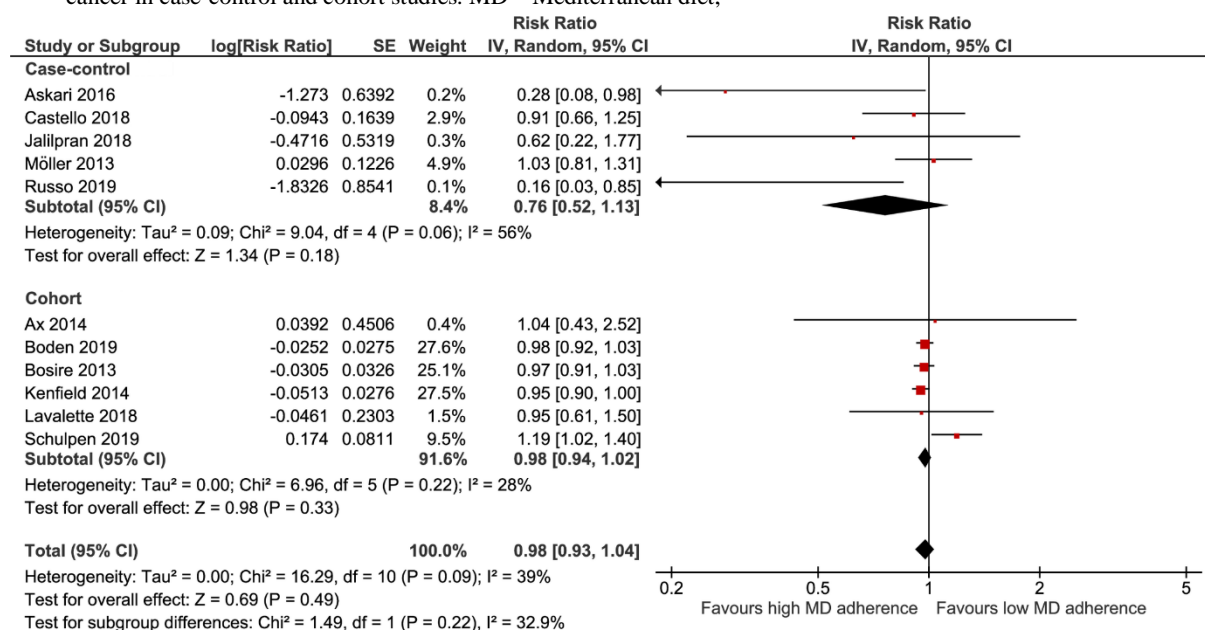

**ESM Figure 20.** Forest plot presenting pooled odds and risk ratios with 95% confidence interval (CI) for prostate cancer in case-control and cohort studies. MD – Mediterranean diet;

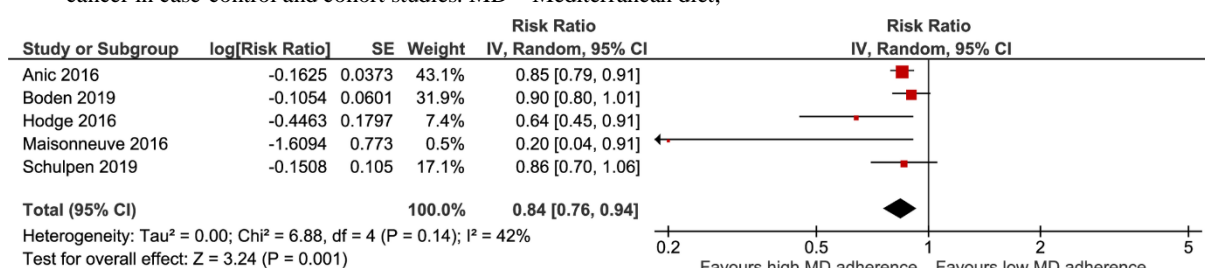

**ESM Figure 21.** Forest plot presenting pooled risk ratio with 95% confidence interval (CI) for respiratory cancer in cohort studies. MD – Mediterranean diet;

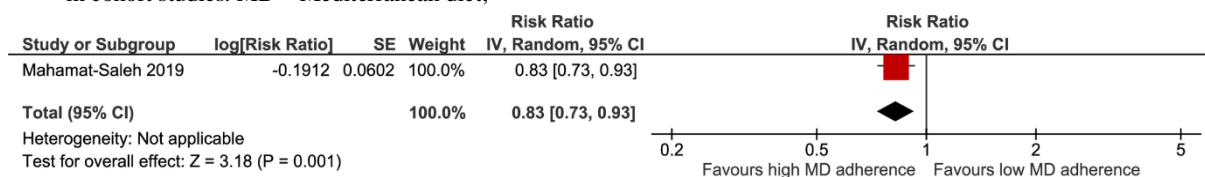

**ESM Figure 22.** Forest plot presenting pooled risk ratio with 95% confidence interval (CI) for skin cancer in cohort studies. MD – Mediterranean diet;

**ESM Table 2.** Subgroup analysis for association between adherence to the MedDiet and risk of cancer mortality.

| Subgroup                    | N  | RR   | 95%CI      | I <sup>2</sup> (%) | P <sub>subgroup</sub> |
|-----------------------------|----|------|------------|--------------------|-----------------------|
| <b>Sex</b>                  |    |      |            |                    |                       |
| Male                        | 6  | 0.88 | 0.82, 0.95 | 90                 | 0.80                  |
| Female                      | 11 | 0.89 | 0.84, 0.95 | 77                 |                       |
| <b>MD score</b>             |    |      |            |                    |                       |
| tMedDiet                    | 6  | 0.88 | 0.77, 0.99 | 77                 | 0.69                  |
| aMedDiet                    | 7  | 0.85 | 0.78, 0.93 | 87                 |                       |
| <b>Location</b>             |    |      |            |                    |                       |
| Mediterranean countries     | 4  | 0.85 | 0.76, 0.95 | 0                  | 0.82                  |
| Non-Mediterranean countries | 13 | 0.86 | 0.81, 0.92 | 87                 |                       |

CI – Confidence interval; NA – Not applicable; aMedDiet – Fung MedDiet Score;  
tMedDiet – Trichopoulou MedDiet score;

**ESM Table 3.** Subgroup analysis for association between adherence to the MedDiet and risk of breast cancer.

| Subgroup                    | N | RR   | 95%CI      | I <sup>2</sup> (%) | P <sub>subgroup</sub> |
|-----------------------------|---|------|------------|--------------------|-----------------------|
| <b>MD score</b>             |   |      |            |                    |                       |
| tMedDiet                    | 4 | 0.99 | 0.87, 1.13 | 38                 | 0.82                  |
| aMedDiet                    | 5 | 0.98 | 0.93, 1.02 | 0                  |                       |
| <b>Location</b>             |   |      |            |                    |                       |
| Mediterranean countries     | 2 | 0.95 | 0.57, 1.59 | 46                 | 0.94                  |
| Non-Mediterranean countries | 8 | 0.98 | 0.94, 1.02 | 0                  |                       |
| <b>Menopausal status</b>    |   |      |            |                    |                       |
| Premenopausal               | 5 | 0.99 | 0.71, 1.37 | 81                 | 0.85                  |
| Postmenopausal              | 8 | 0.95 | 0.92, 0.99 | 0                  |                       |
| <b>Receptor expression</b>  |   |      |            |                    |                       |
| ER+                         | 4 | 0.98 | 0.89, 1.06 | 30                 | 0.85                  |
| ER-                         | 4 | 0.86 | 0.64, 1.15 | 73                 |                       |
| PR+                         | 2 | 1.00 | 0.91, 1.09 | 0                  |                       |
| PR-                         | 2 | 0.91 | 0.61, 1.36 | 82                 |                       |
| ER+/PR+                     | 4 | 0.95 | 0.88, 1.02 | 21                 |                       |
| ER-/PR-                     | 4 | 0.89 | 0.66, 1.20 | 76                 |                       |
| ER+/PR-                     | 1 | 0.98 | 0.81, 1.19 | NA                 |                       |
| ER-/PR+                     | 1 | 0.82 | 0.56, 1.20 | NA                 |                       |
| ER-/PR-/HER2-               | 1 | 0.66 | 0.37, 1.19 | NA                 |                       |

CI – Confidence interval; NA – Not applicable; aMedDiet – Fung MedDiet Score;  
tMedDiet – Trichopoulou MedDiet score;

**ESM Table 4.** Subgroup analysis for association between adherence to the MedDiet and risk of colorectal cancer.

| Subgroup                    | N | RR   | 95%CI      | I <sup>2</sup> (%) | P <sub>subgroup</sub> |
|-----------------------------|---|------|------------|--------------------|-----------------------|
| <b>Sex</b>                  |   |      |            |                    |                       |
| Male                        | 6 | 0.88 | 0.78, 0.98 | 72                 | 0.14                  |
| Female                      | 9 | 0.91 | 0.90, 1.00 | 0                  |                       |
| <b>MD score</b>             |   |      |            |                    |                       |
| tMedDiet                    | 2 | 0.88 | 0.80, 0.98 | 0                  | 0.84                  |
| aMedDiet                    | 5 | 0.89 | 0.82, 0.98 | 53                 |                       |
| <b>Location</b>             |   |      |            |                    |                       |
| Mediterranean countries     | 1 | 1.02 | 0.51, 2.04 | NA                 | 0.79                  |
| Non-Mediterranean countries | 8 | 0.93 | 0.86, 1.00 | 61                 |                       |
| <b>Anatomical site</b>      |   |      |            |                    |                       |
| Proximal colon              | 5 | 1.01 | 0.93, 1.09 | 0                  | 0.03                  |
| Distal colon                | 5 | 0.88 | 0.79, 0.96 | 0                  |                       |
| Rectum                      | 7 | 0.86 | 0.75, 0.98 | 42                 |                       |

CI – Confidence interval; NA – Not applicable; aMedDiet – Fung MedDiet Score;  
tMedDiet – Trichopoulou MedDiet score;

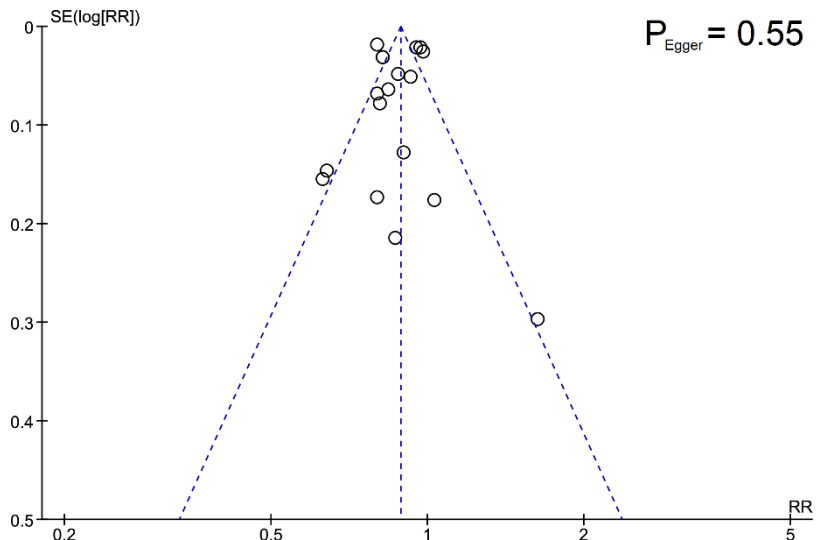

**ESM Figure 23.** Funnel plot showing study precision against the relative risk effect estimate for cancer mortality.  $P_{\text{Egger}}$  – P-value for Egger’s linear regression test; SE – Standard error;

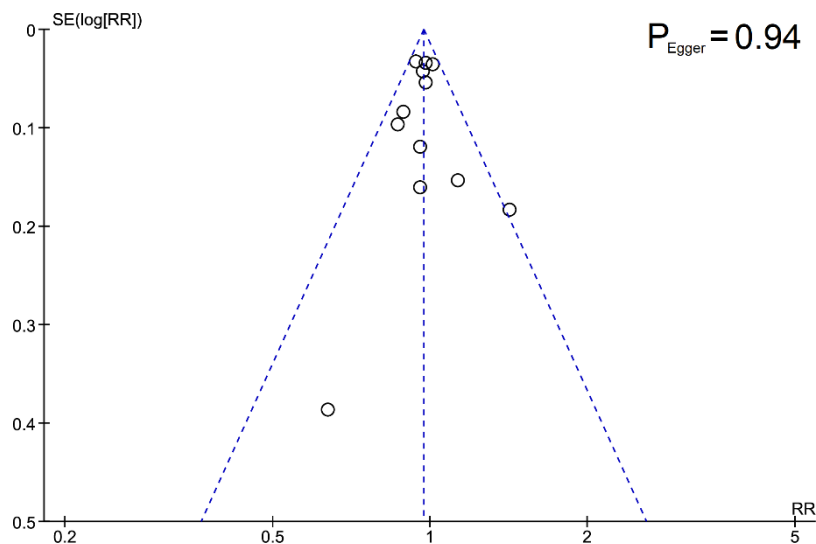

**ESM Figure 24.** Funnel plot showing study precision against the relative risk effect estimate for breast cancer.  $P_{\text{Egger}}$  – P-value for Egger’s linear regression test; SE – Standard error;

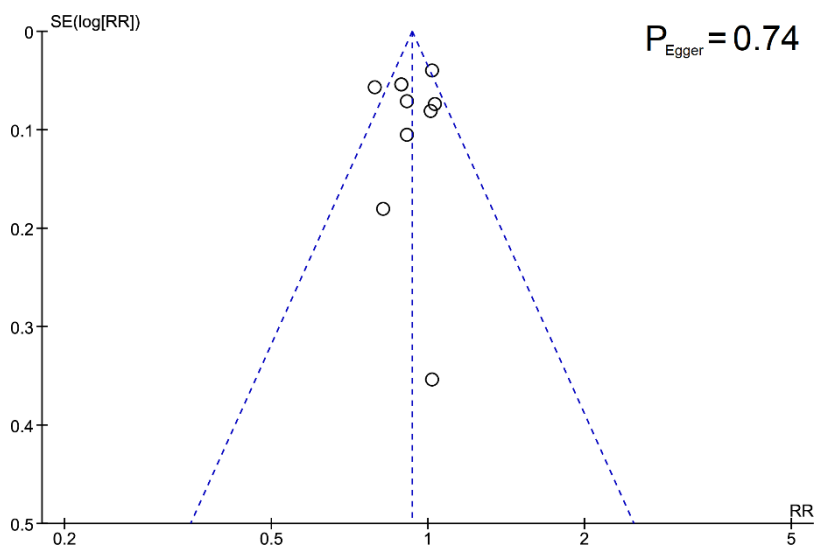

**ESM Figure 25.** Funnel plot showing study precision against the relative risk effect estimate for colorectal cancer.  $P_{\text{Egger}}$  – P-value for Egger’s linear regression test; SE – Standard error;

**ESM Table 5.** Item-level scoring for NutriGrade tool and quality of evidence for identified associations in cohort studies and randomized controlled trials.

| Outcome                             | Risk of bias, study quality, and study limitations | Precision | Heterogeneity | Directness | Publication bias | Funding bias | Effect size <sup>1</sup>  | Dose response <sup>1</sup> | Total score | Quality of evidence |
|-------------------------------------|----------------------------------------------------|-----------|---------------|------------|------------------|--------------|---------------------------|----------------------------|-------------|---------------------|
| <b>Cohort studies</b>               |                                                    |           |               |            |                  |              |                           |                            |             |                     |
| All-cause mortality among survivors | 2 points                                           | 1 points  | 0.4 points    | 0 points   | 0 points         | 1 point      | 0.5 points                | 0 points                   | 4.9 points  | Low                 |
| Biliary tract cancer                | 1 point                                            | 0 points  | 0 points      | 0 points   | 0 points         | 1 point      | 0 points                  | 0 points                   | 2 points    | Very low            |
| Bladder cancer                      | 2 points                                           | 1 point   | 0 point       | 1 point    | 0 points         | 1 point      | 0 points                  | 0 points                   | 5 points    | Low                 |
| Blood cancer                        | 2 points                                           | 1 point   | 0 point       | 0 points   | 0 points         | 1 point      | 0 points                  | 0 points                   | 4 points    | Low                 |
| Breast cancer                       | 2 points                                           | 1 points  | 0.8 points    | 0 points   | 0.5 points       | 1 point      | 0 points                  | 0 points                   | 5.3 points  | Low                 |
| Cancer reoccurrence among survivors | 1 point                                            | 0 points  | 0 points      | 0 points   | 0 points         | 1 point      | 0 points                  | 0 points                   | 2 points    | Very low            |
| Cancer mortality                    | 2 points                                           | 1 point   | 0.6 points    | 1 point    | 0.5 points       | 1 point      | 0 points                  | 0 points                   | 6.1 points  | Moderate            |
| Cancer mortality among survivors    | 2 points                                           | 0 points  | 0 points      | 0 point    | 0 points         | 1 point      | 0 points                  | 0 points                   | 3 points    | Very low            |
| Colorectal cancer                   | 2 points                                           | 1 point   | 0.6 points    | 1 point    | 1 point          | 1 point      | 0 points                  | 0 points                   | 6.6 points  | Moderate            |
| Endometrial cancer                  | 1 point                                            | 0 points  | 0 points      | 0 points   | 0 points         | 1 point      | 0 points                  | 0 points                   | 2 points    | Very low            |
| Esophageal cancer                   | 2 points                                           | 0 points  | 0 point       | 0 points   | 0 points         | 1 point      | 0 points                  | 0 points                   | 3 points    | Very low            |
| Gallbladder cancer                  | 1 point                                            | 0 points  | 0 points      | 0 points   | 0 points         | 1 point      | 0 points                  | 0 points                   | 2 points    | Very low            |
| Gastric cancer                      | 2 points                                           | 1 point   | 0 point       | 1 point    | 0 points         | 1 point      | 1 point                   | 0 points                   | 5 points    | Very low            |
| Glioma                              | 1 point                                            | 1 point   | 0 points      | 0 points   | 0 points         | 1 point      | 0 points                  | 0 points                   | 3 points    | Very low            |
| Head and neck cancer                | 1 point                                            | 1 point   | 0 points      | 0 points   | 0 points         | 1 point      | 0 points                  | 0 points                   | 3 points    | Low                 |
| Liver cancer                        | 2 points                                           | 1 point   | 0 points      | 0 points   | 0 points         | 1 point      | 1 point                   | 0 points                   | 4 points    | Very low            |
| Ovarian cancer                      | 1 point                                            | 0 points  | 0 points      | 0 points   | 0 points         | 1 point      | 0 points                  | 0 points                   | 2 points    | Very low            |
| Pancreatic cancer                   | 2 points                                           | 0 points  | 0 points      | 0 points   | 0 points         | 1 point      | 0 points                  | 0 points                   | 3 points    | Low                 |
| Prostate cancer                     | 2 points                                           | 1 point   | 0.8 points    | 1 point    | 0 points         | 1 point      | 0 points                  | 0 points                   | 5.8 points  | Very low            |
| Respiratory cancer                  | 2 points                                           | 1 point   | 0 points      | 1 point    | 0 points         | 1 point      | 0 points                  | 0 points                   | 5 points    | Very low            |
| Skin cancer                         | 1 point                                            | 1 point   | 0 points      | 0 points   | 0 points         | 1 point      | 0 points                  | 0 points                   | 3 points    | Low                 |
| <b>Randomized controlled trials</b> |                                                    |           |               |            |                  |              |                           |                            |             |                     |
|                                     | Risk of bias, study quality, and study limitations | Precision | Heterogeneity | Directness | Publication bias | Funding bias | Study design <sup>2</sup> | -                          | Total score | Low                 |
| Cancer mortality                    | 2.25 points                                        | 0 points  | 0 points      | 0 points   | 0 points         | 1 point      | 2 points                  | -                          | 5.25 points | Very low            |
| Breast cancer                       | 2 points                                           | 0 points  | 0 points      | 0 points   | 0 points         | 1 point      | 2 points                  | -                          | 5 points    | Low                 |

<sup>1</sup>Applies only for cohort studies; <sup>2</sup>Applies only for randomized controlled trials;
